# Supplementary material for: Patterns and frequency of renal abnormalities in Fanconi anaemia: implications for long-term management
Source: Springer Nature journal article supplement (doi:10.1007/s00467-018-3952-0), 2018-04-12
Supplement: MOESM1 [file 15631466]

Supplemental Figure 1

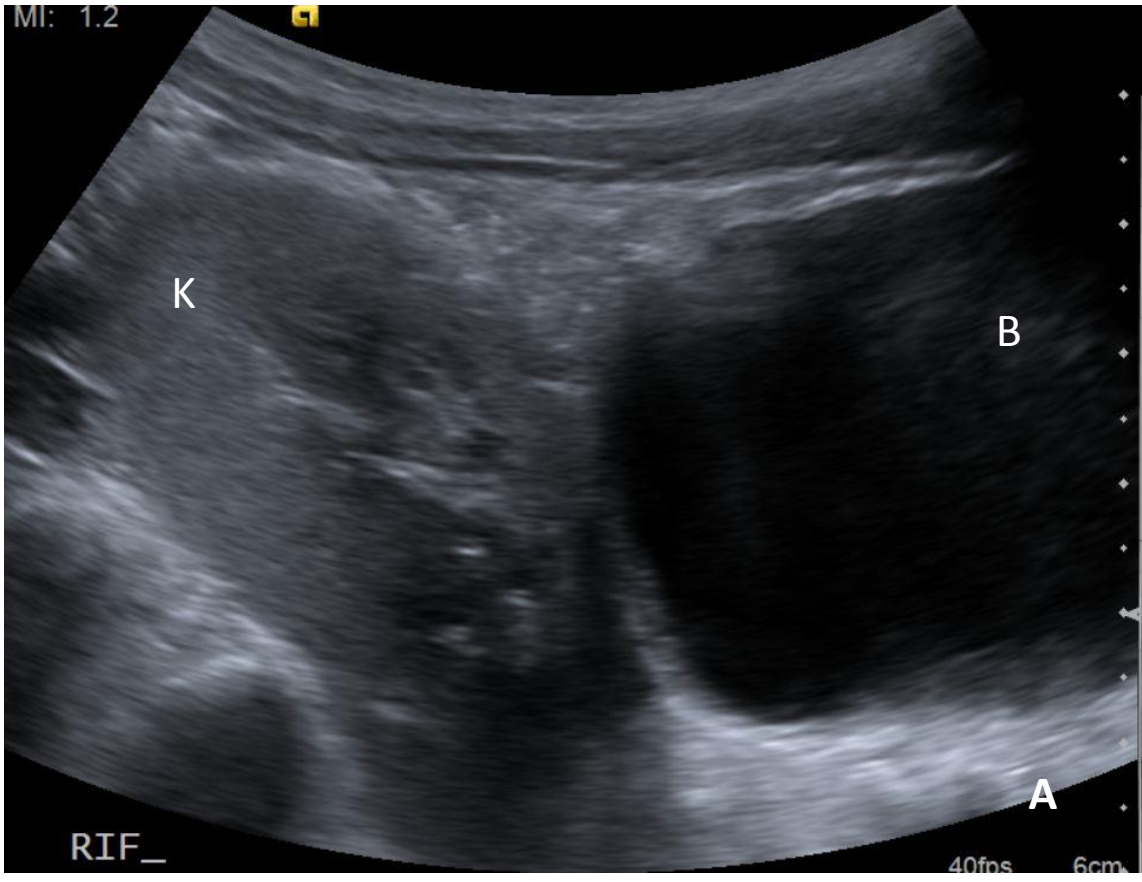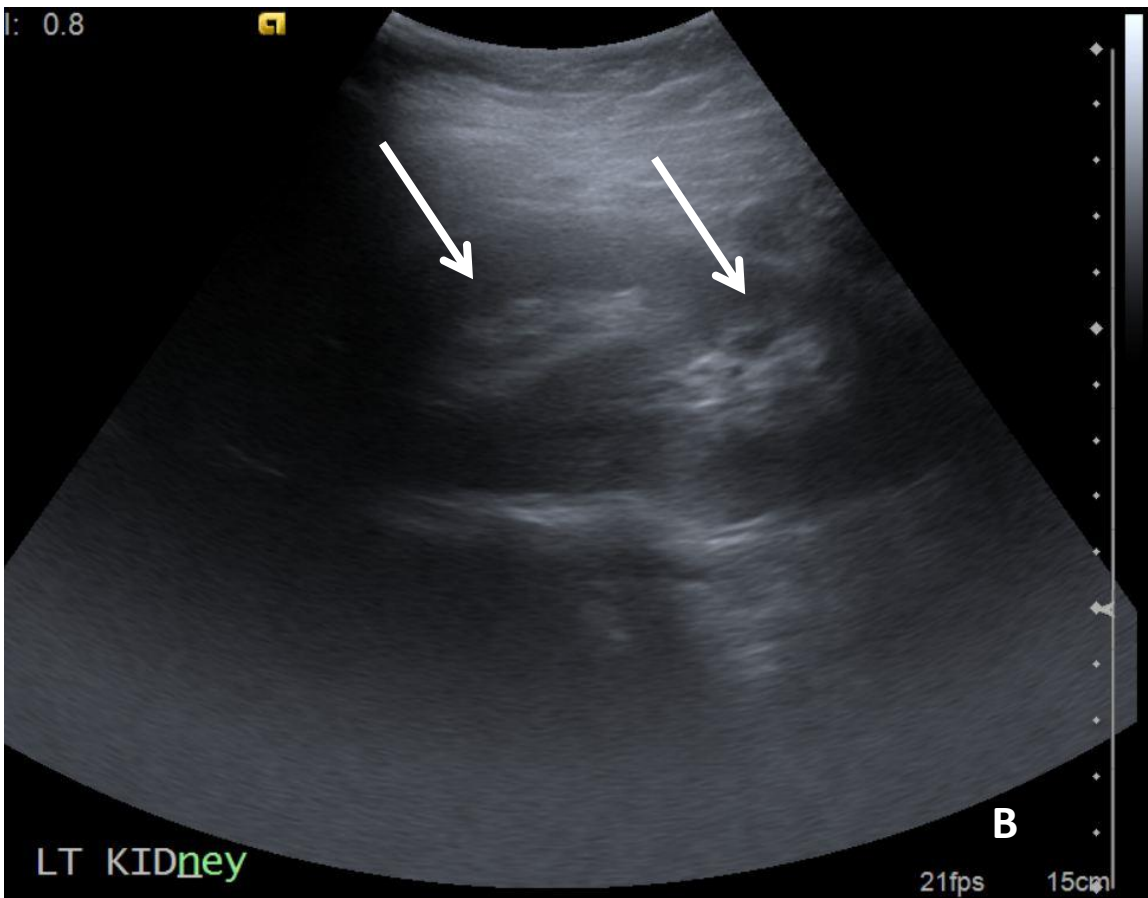

Supplemental Figure 2

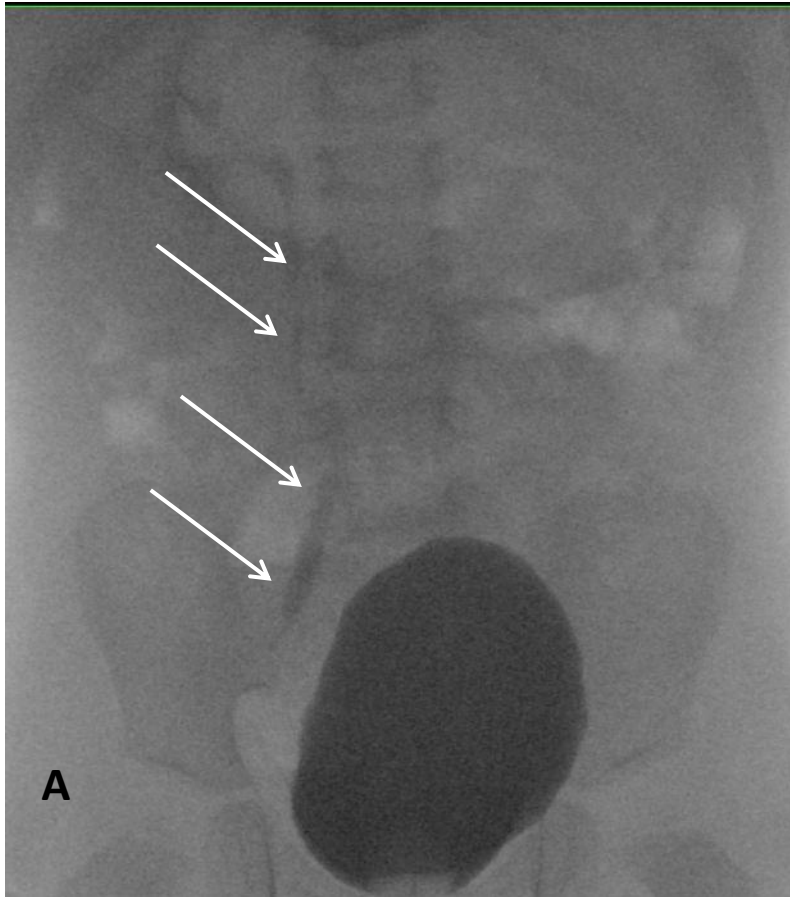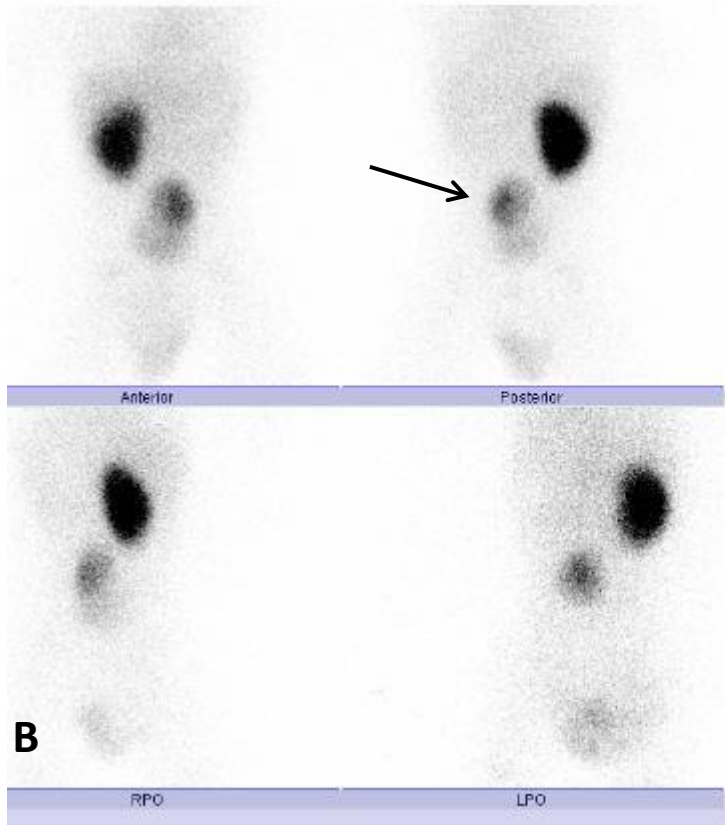

| (Counts)   | Geometric Mean |               |
|------------|----------------|---------------|
|            | Left<br>D10K   | Right<br>D49K |
| Total      | D10K           | D49K          |
| (% Ratios) | Left           | Right         |
| Total      | 16.65          | 83.35         |

Supplemental Figure 3

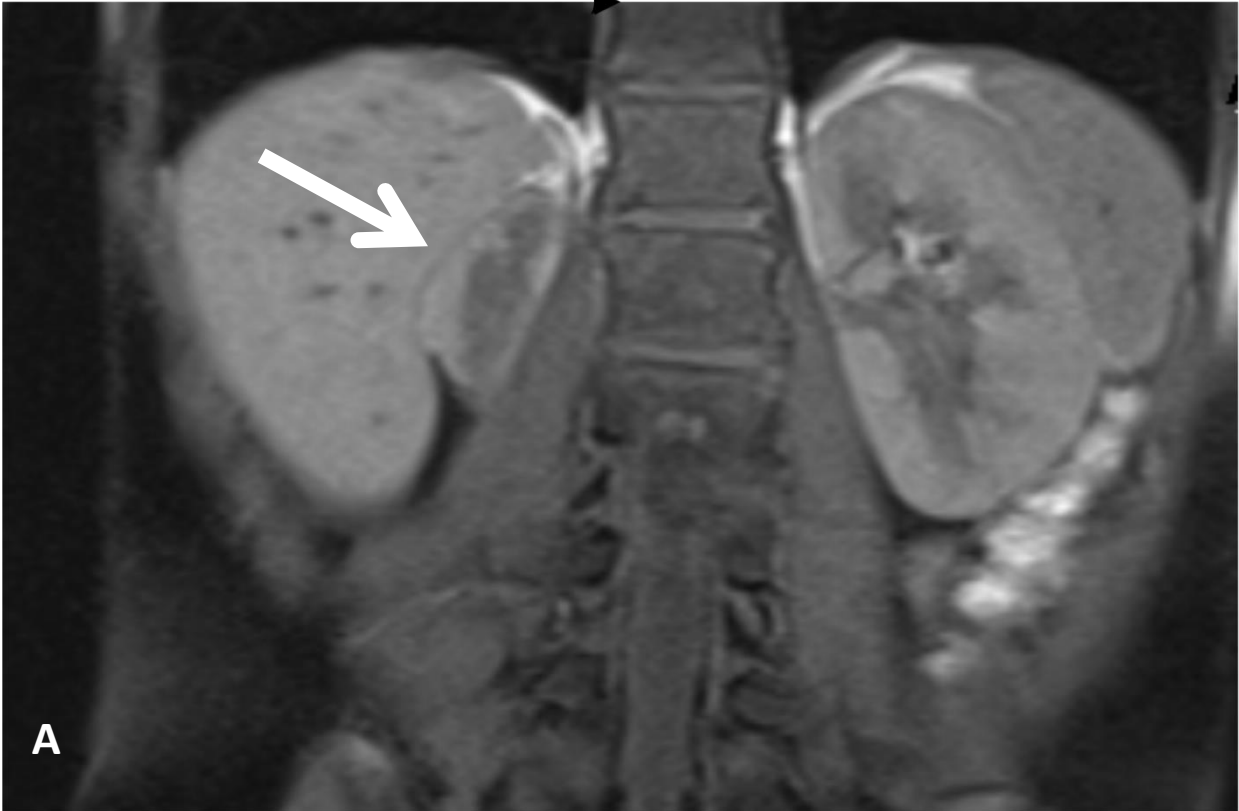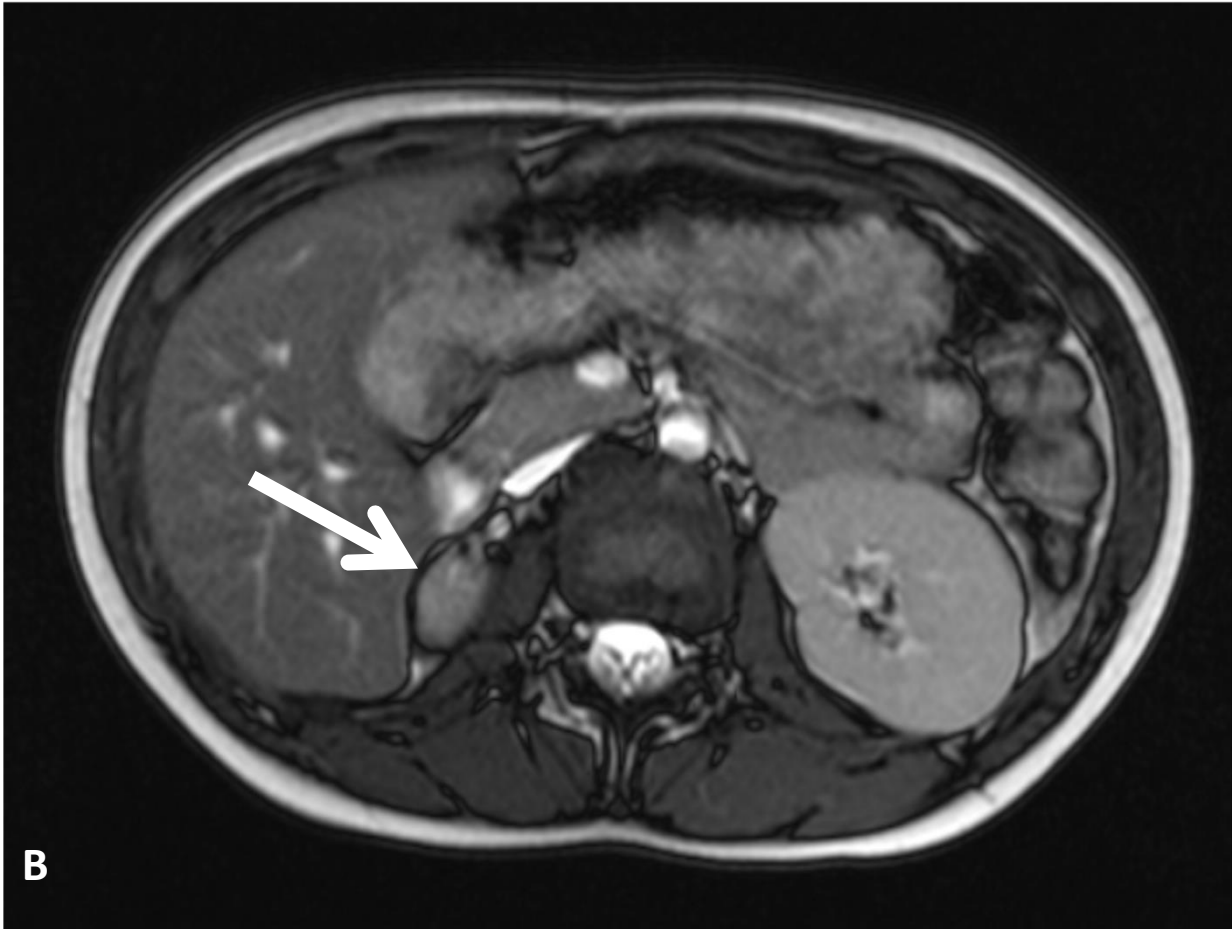

Supplemental Figure 4

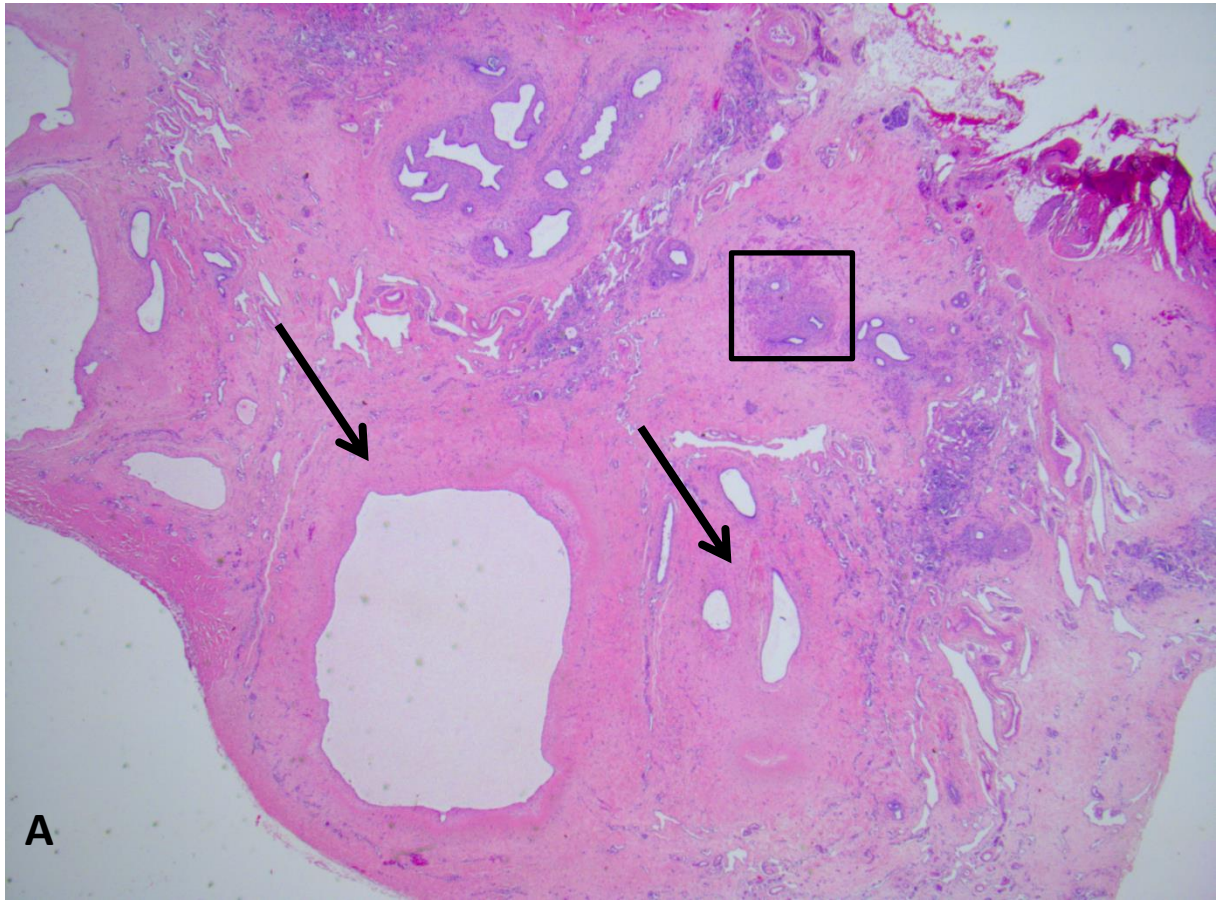

A

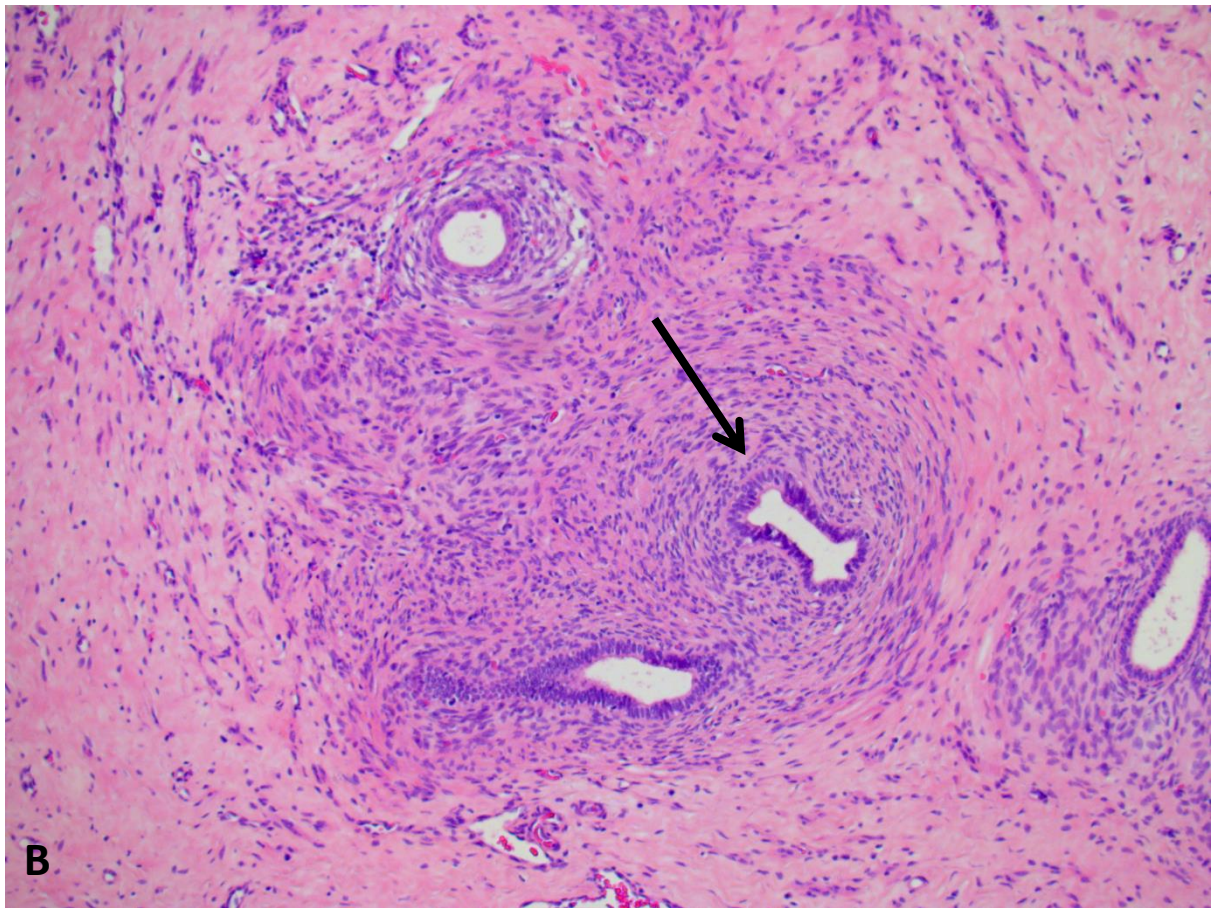

B

## Figure legends to supplemental figures:

**Supplemental Figure 1:** Ultrasound findings in individuals with Fanconi anaemia .

**A:** Pelvic kidney (K) in close proximity to the filled Bladder (B). **B:** Fused ectopic Kidney with two collecting systems (arrows).

**Supplemental Figure 2:** **A:** Micturating cysto-urethrogram (MCUG) demonstrating vesico-ureteral reflux (arrows) in a patient with FA. **B.** DMSA scan showing decreased uptake and therefore impaired function of an ectopic dysplastic kidney.

**Supplemental Figure 3:** **A:** Coronal T1 FS sequence shows an atrophic right side kidney marked (arrow). Normal size left kidney B: Axial T1 sequence. Small kidney diameter (arrow) of left dysplastic kidney.

**Supplemental Figure 4:** Histology of dysplastic kidney associated with FA **A:** Complete disorganisation of the renal parenchyma with extensive fibrosis (x40) . **B:** Dysplastic tubules are cuffed by primitive mesenchyme (x100), and several are cystically dilated (arrows).
